# Supplementary material for: Alkoxy-substituted difluoroboron benzoylmethanes for photonics applications: A photophysical and spectroscopic study
Source: Royal Society of Chemistry journal article supplement (doi:10.1039/c0dt00588f), 2010-11-25
Supplement: c0dt00588f.pdf [file c0dt00588f.pdf]

## Supporting Information

### Alkoxy-substituted difluoroboron benzoylmethanes for photonics applications: a photophysical and spectroscopic study

María José Mayoral,<sup>a</sup> Paloma Ovejero,<sup>a</sup> Mercedes Cano<sup>\*a</sup> and Guillermo Orellana<sup>\*b</sup>

<sup>a</sup> Department of Inorganic Chemistry I, Faculty of Chemistry, Universidad Complutense de Madrid, E-28040 Madrid, Spain. Fax: 34 9139 44352; Tel: 34 91 394 43 41;

E-mail: mmcano@quim.ucm.es

<sup>b</sup> Department of Organic Chemistry, Faculty of Chemistry, Universidad Complutense de Madrid, E-28040 Madrid, Spain. Fax: 34 9139 44103; Tel: 34 91 394 4220;

E-mail: orellana@quim.ucm.es

Table S1. Fluorescence lifetimes ( $\tau$ ) in ns of adduct **7** as a function of the Reichardt's spectroscopic solvent polarity scale ( $E_T^N(30)$ )

| Solvent         | $E_T^N(30)^{[a]}$ | $\tau^{[b]}$ |
|-----------------|-------------------|--------------|
| Methanol        | 0.762             | 1.79         |
| Acetonitrile    | 0.460             | 1.75         |
| Acetone         | 0.355             | 1.76         |
| Dichloromethane | 0.309             | 1.67         |
| Tetrahydrofuran | 0.207             | 1.73         |
| Toluene         | 0.099             | 1.65         |

<sup>[a]</sup> C. Reichardt, Solvents and Solvent effects in Organic Chemistry, Wiley-VCH, 2003, pp. 418-425; <sup>[b]</sup> Uncertainty:  $\pm 3\%$ .

Table S2. Yields and analytical data of the BDFs

|          | MOLECULAR FORMULA                                              | Yield (%) | Elemental analysis |      |           |      |
|----------|----------------------------------------------------------------|-----------|--------------------|------|-----------|------|
|          |                                                                |           | Requires (%)       |      | Found (%) |      |
|          |                                                                |           | C                  | H    | C         | H    |
| <b>1</b> | C <sub>27</sub> H <sub>42</sub> BF <sub>2</sub> O <sub>3</sub> | 61        | 66,3               | 8,2  | 66,0      | 8,1  |
| <b>2</b> | C <sub>29</sub> H <sub>46</sub> BF <sub>2</sub> O <sub>3</sub> | 65        | 67,7               | 8,6  | 67,6      | 8,3  |
| <b>3</b> | C <sub>31</sub> H <sub>50</sub> BF <sub>2</sub> O <sub>3</sub> | 63        | 68,8               | 9,0  | 68,9      | 8,8  |
| <b>4</b> | C <sub>33</sub> H <sub>54</sub> BF <sub>2</sub> O <sub>3</sub> | 62        | 69,8               | 9,3  | 69,9      | 8,9  |
| <b>5</b> | C <sub>35</sub> H <sub>51</sub> BF <sub>2</sub> O <sub>4</sub> | 56        | 71,9               | 8,8  | 71,7      | 8,9  |
| <b>6</b> | C <sub>39</sub> H <sub>59</sub> BF <sub>2</sub> O <sub>4</sub> | 52        | 73,1               | 9,3  | 73,0      | 9,0  |
| <b>7</b> | C <sub>43</sub> H <sub>67</sub> BF <sub>2</sub> O <sub>4</sub> | 54        | 74,1               | 9,7  | 73,8      | 9,6  |
| <b>8</b> | C <sub>47</sub> H <sub>75</sub> BF <sub>2</sub> O <sub>4</sub> | 52        | 75,0               | 10,0 | 75,1      | 9,7  |
| <b>9</b> | C <sub>51</sub> H <sub>83</sub> BF <sub>2</sub> O <sub>4</sub> | 53        | 75,7               | 10,3 | 75,5      | 10,0 |

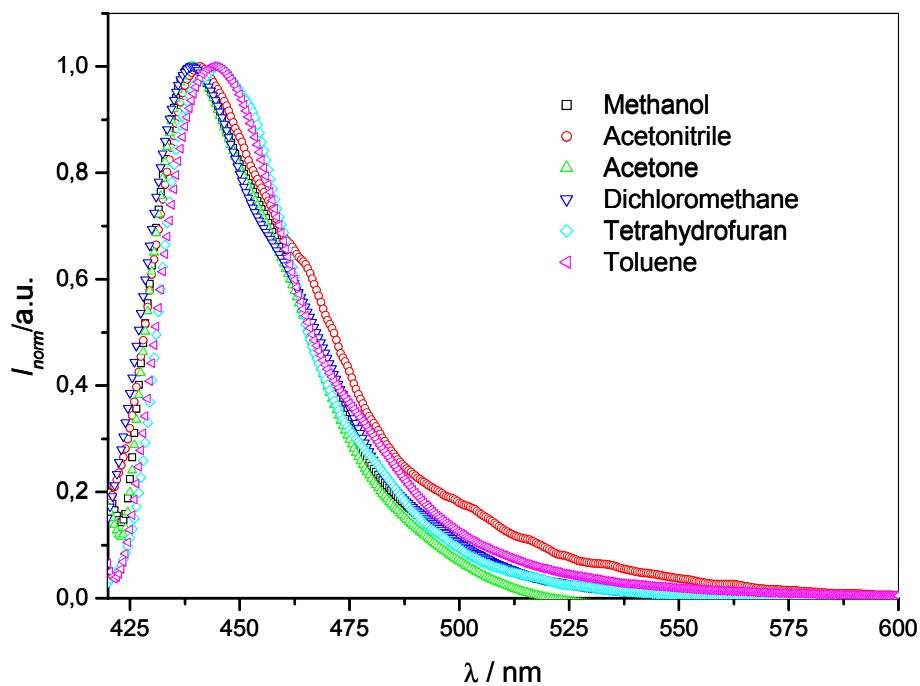

**Fig. S1** Normalized fluorescence spectra of adduct 7 ( $\lambda_{ex} = 415$  nm) in different solvents at room temperature ( $1-5 \times 10^{-5}$  M)

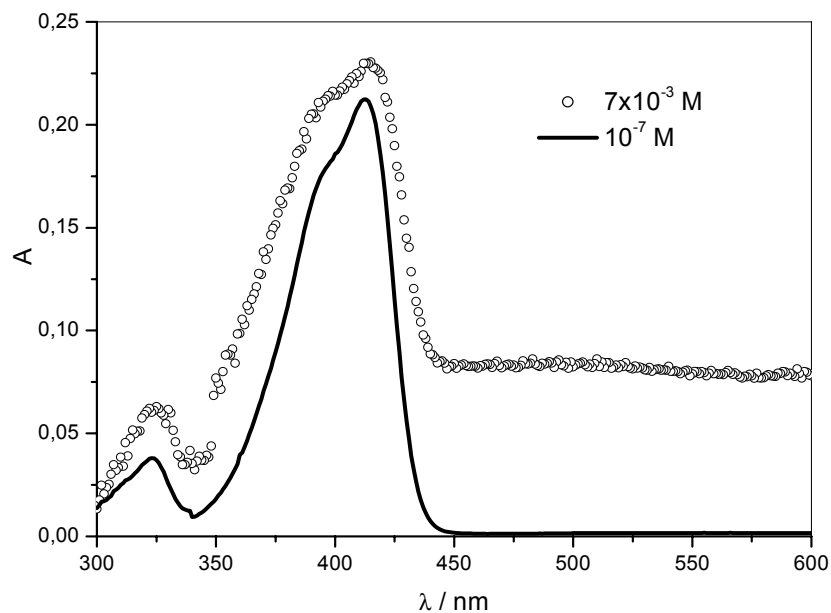

**Fig. S2** UV-Vis absorption spectra of adduct 7 of  $10^{-7}$  and  $7 \times 10^{-3}$  M solutions in dichloromethane. The latter spectrum was recorded using a 1 mm pathlength Hellma absorption cell in the *front face* configuration on a Cary 5 spectrophotometer fit with the diffuse reflectance accessory.

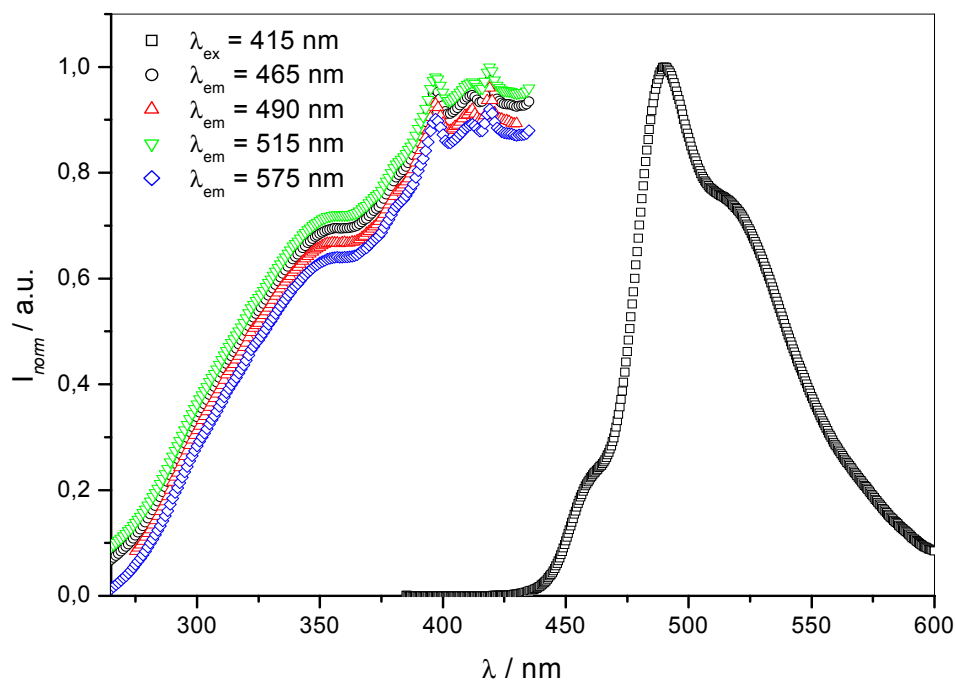

**Fig. S3** Normalized excitation and emission spectra of adduct **7** of  $7 \times 10^{-3}$  M solutions in dichloromethane acquired in the *front face* configuration. The excitation spectra have been offset for the sake of comparison.

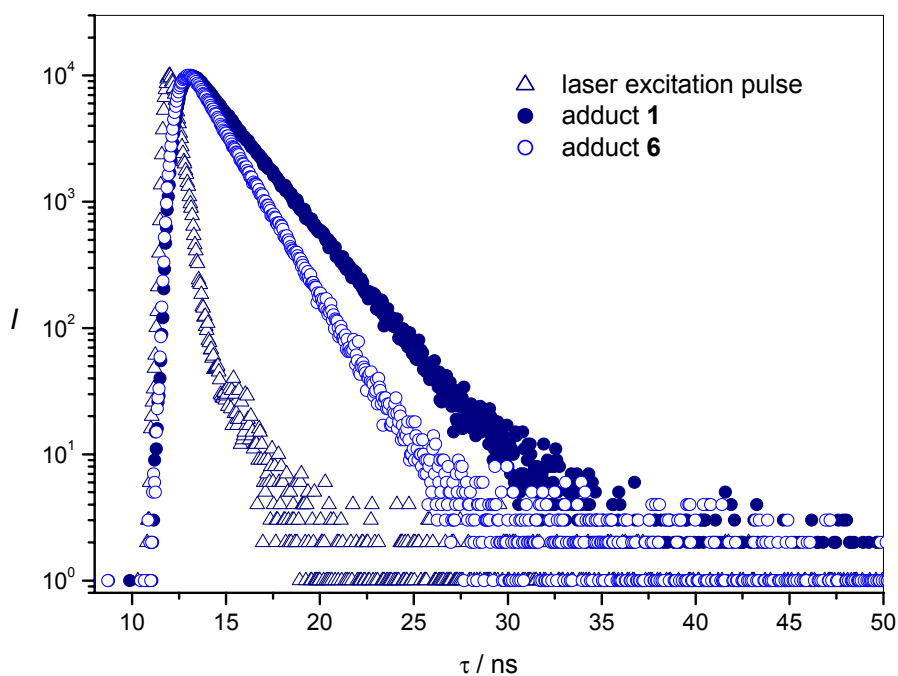

**Fig. S4** Diode laser excitation pulse profile ( $\Delta$ ) and emission decay curves of adducts **1** ( $\tau = 2.32$  ns with  $\chi^2 = 1.018$ ) ( $\bullet$ ) and **6** ( $\tau = 1.68$  ns with  $\chi^2 = 1.031$ ) ( $\circ$ ) in  $2 \times 10^{-7}$  M dichloromethane solution analyzed as a monoexponential function.

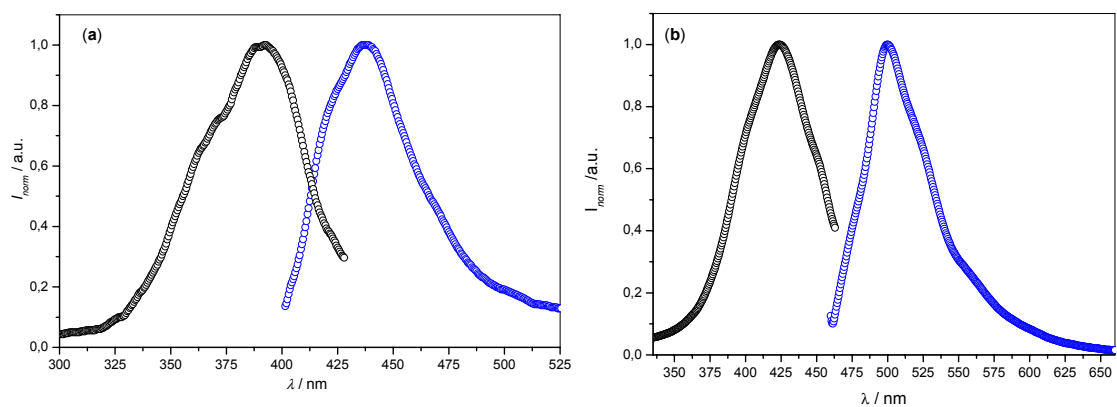

**Fig. S5** Normalized excitation and emission spectra of adducts (a) **2** and (b) **9** in the solid state (front face configuration).

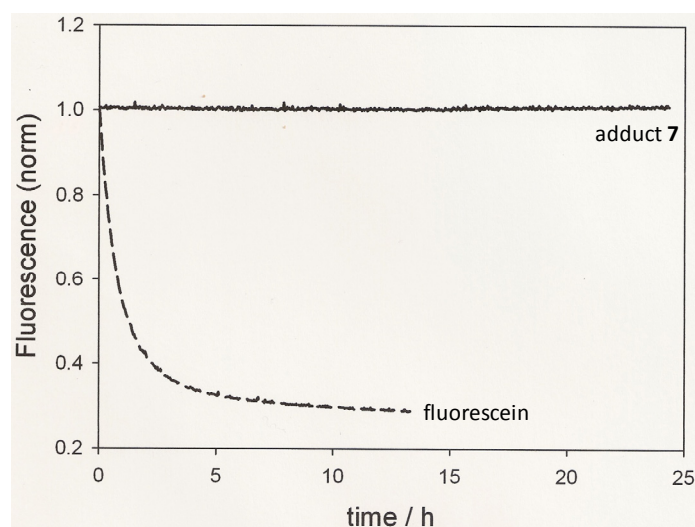

**Fig. S6** Comparison of the photostability of fluorescein and **7** in EtOH/H<sub>2</sub>O (1:5v/v) under laser light (He-Cd, 442 nm, 5.8 mW). The absorbance at the excitation wavelength was 2.0 in both cases.
